# Supplementary material for: Global patterns and drivers of phosphorus fractions in natural soils
Source: Copernicus journal article supplement (doi:10.5194/bg-20-4147-2023), 2023-10-11
Supplement: Supplementary file 1 [file bg-20-4147-2023-supplement.pdf]

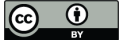

*Supplement of*

## **Global patterns and drivers of phosphorus fractions in natural soils**

**Xianjin He et al.**

*Correspondence to:* Daniel S. Goll (dsgoll123@gmail.com) and Enqing Hou (houeq@scbg.ac.cn)

The copyright of individual parts of the supplement might differ from the article licence.

**Table S1. Gridded data**

| <b>Group</b>      | <b>Variables</b>          | <b>Brief description</b>                          | <b>Original resolution</b> | <b>Data source</b>                                                                                      |
|-------------------|---------------------------|---------------------------------------------------|----------------------------|---------------------------------------------------------------------------------------------------------|
| <b>Climate</b>    | Mean annual temperature   | 30-yr (1981 to 2010) annual average temperature   | 1 km                       | <a href="http://worldclim.org/bioclim">http://worldclim.org/bioclim</a>                                 |
|                   | Mean annual precipitation | 30-yr (1981 to 2010) annual average precipitation | 1 km                       | <a href="http://worldclim.org/bioclim">http://worldclim.org/bioclim</a>                                 |
|                   | Biomes                    | Potential Biomes                                  | 1 km                       | <a href="https://sedac.ciesin.columbia.edu">https://sedac.ciesin.columbia.edu</a>                       |
| <b>Soil</b>       | Total soil phosphorus     | Total soil phosphorus concentration               | 50 km                      | <a href="https://doi.org/10.6084/m9.figshare.14583375">https://doi.org/10.6084/m9.figshare.14583375</a> |
|                   | Soil organic carbon       | Soil organic carbon concentration                 | 250 m                      | <a href="https://openlandmap.org">https://openlandmap.org</a>                                           |
|                   | Soil pH                   | Soil pH                                           | 250 m                      | <a href="https://openlandmap.org">https://openlandmap.org</a>                                           |
|                   | Soil clay                 | Soil clay content                                 | 250 m                      | <a href="https://openlandmap.org">https://openlandmap.org</a>                                           |
|                   | Soil sand                 | Soil sand content                                 | 250 m                      | <a href="https://openlandmap.org">https://openlandmap.org</a>                                           |
|                   | Soil order                | Taxonomy soil order class                         | 250 m                      | <a href="https://openlandmap.org">https://openlandmap.org</a>                                           |
|                   | Soil depth                | Soil depth                                        | 10 km                      | <a href="http://globalchange.bnu.edu.cn/research/data">http://globalchange.bnu.edu.cn/research/data</a> |
| <b>Topography</b> | Elevation                 | Land surface elevation                            | 250 m                      | <a href="https://openlandmap.org">https://openlandmap.org</a>                                           |

22 **Table S2. Comparison of P pool concentrations between our estimates and estimates by Yang *et al.* (2013).**

|               | Labile Pi | Organic P | Moderately labile Pi | Primary P | Occluded P |
|---------------|-----------|-----------|----------------------|-----------|------------|
| <b>Median</b> |           |           |                      |           |            |
| He            | 29.9      | 157.6     | 46.1                 | 95.6      | 215.8      |
| Yang          | 27.9      | 69.4      | 26.8                 | 89.1      | 104.0      |
| <b>Mean</b>   |           |           |                      |           |            |
| He            | 34.4      | 195.2     | 62.9                 | 111.2     | 213.3      |
| Yang          | 33.5      | 85.4      | 30.6                 | 117.5     | 115.6      |

23

24

25 **Figure S1. Comparison of site-level Hedley P pool measurement distributions between our database and Yang et al.'s**  
26 **(2013).** Our database (A) contains 1838 observations, while Yang et al. (2013) (B) contains 178.

A

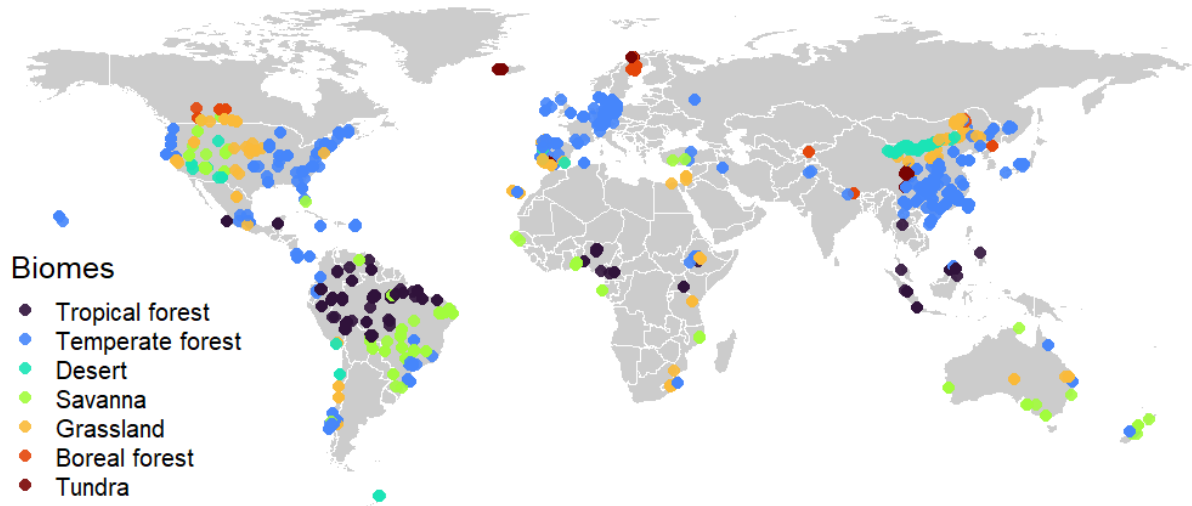

B

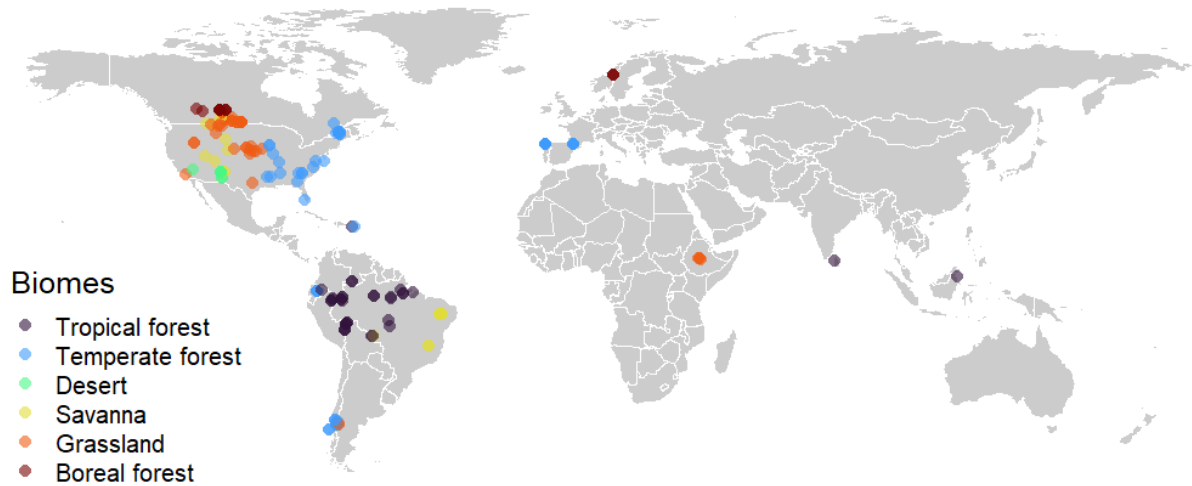

27

28

Figure S2. PRISMA flow diagram showing the procedure used for selection of studies for synthesis.

29

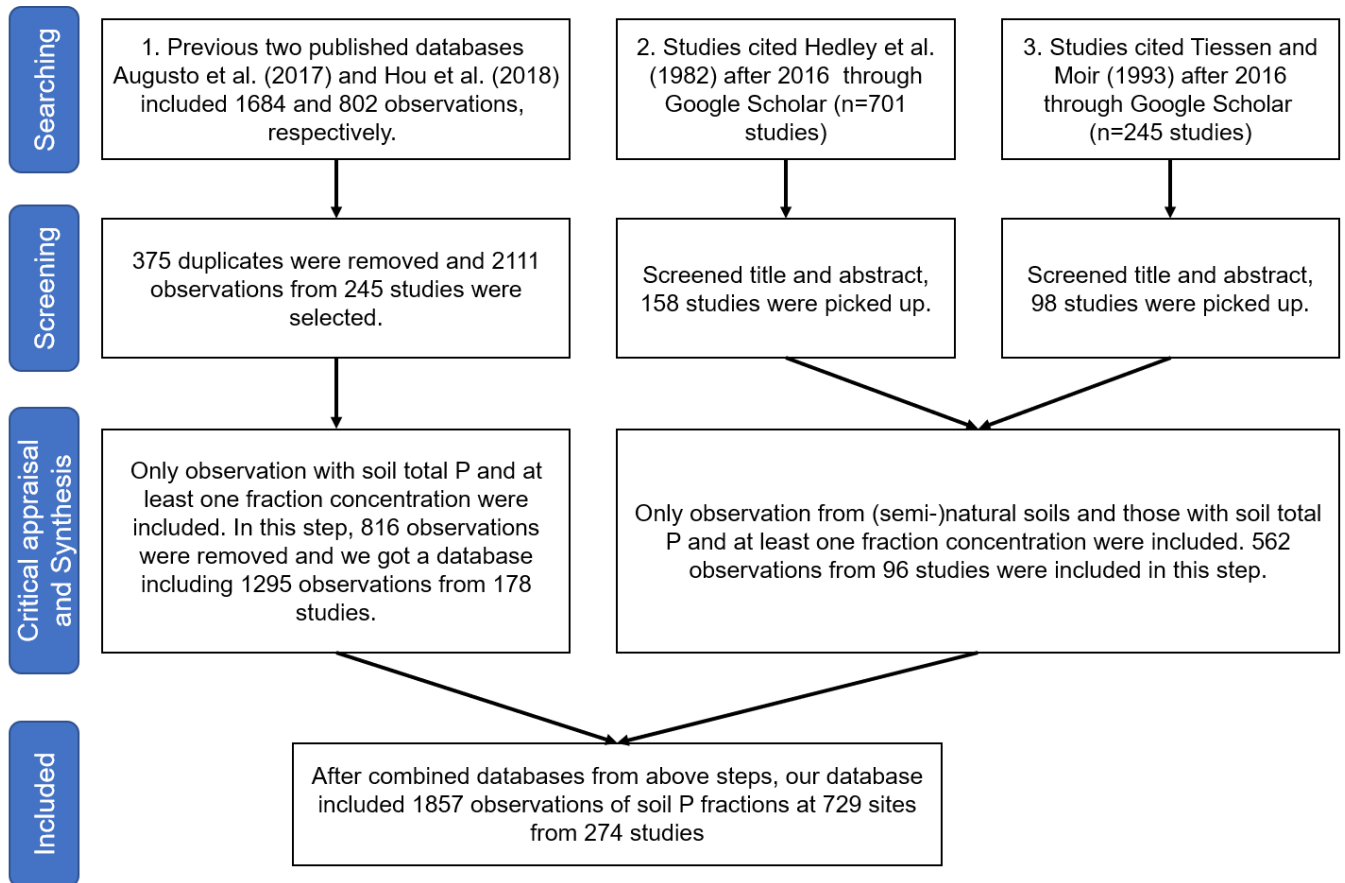

30

31

32 **Figure S3. Partial dependence plots showing dependence of centralized soil P pool concentrations on predictors.** To  
33 simplify comparison, partial dependent analysis results are centralized in this plot.

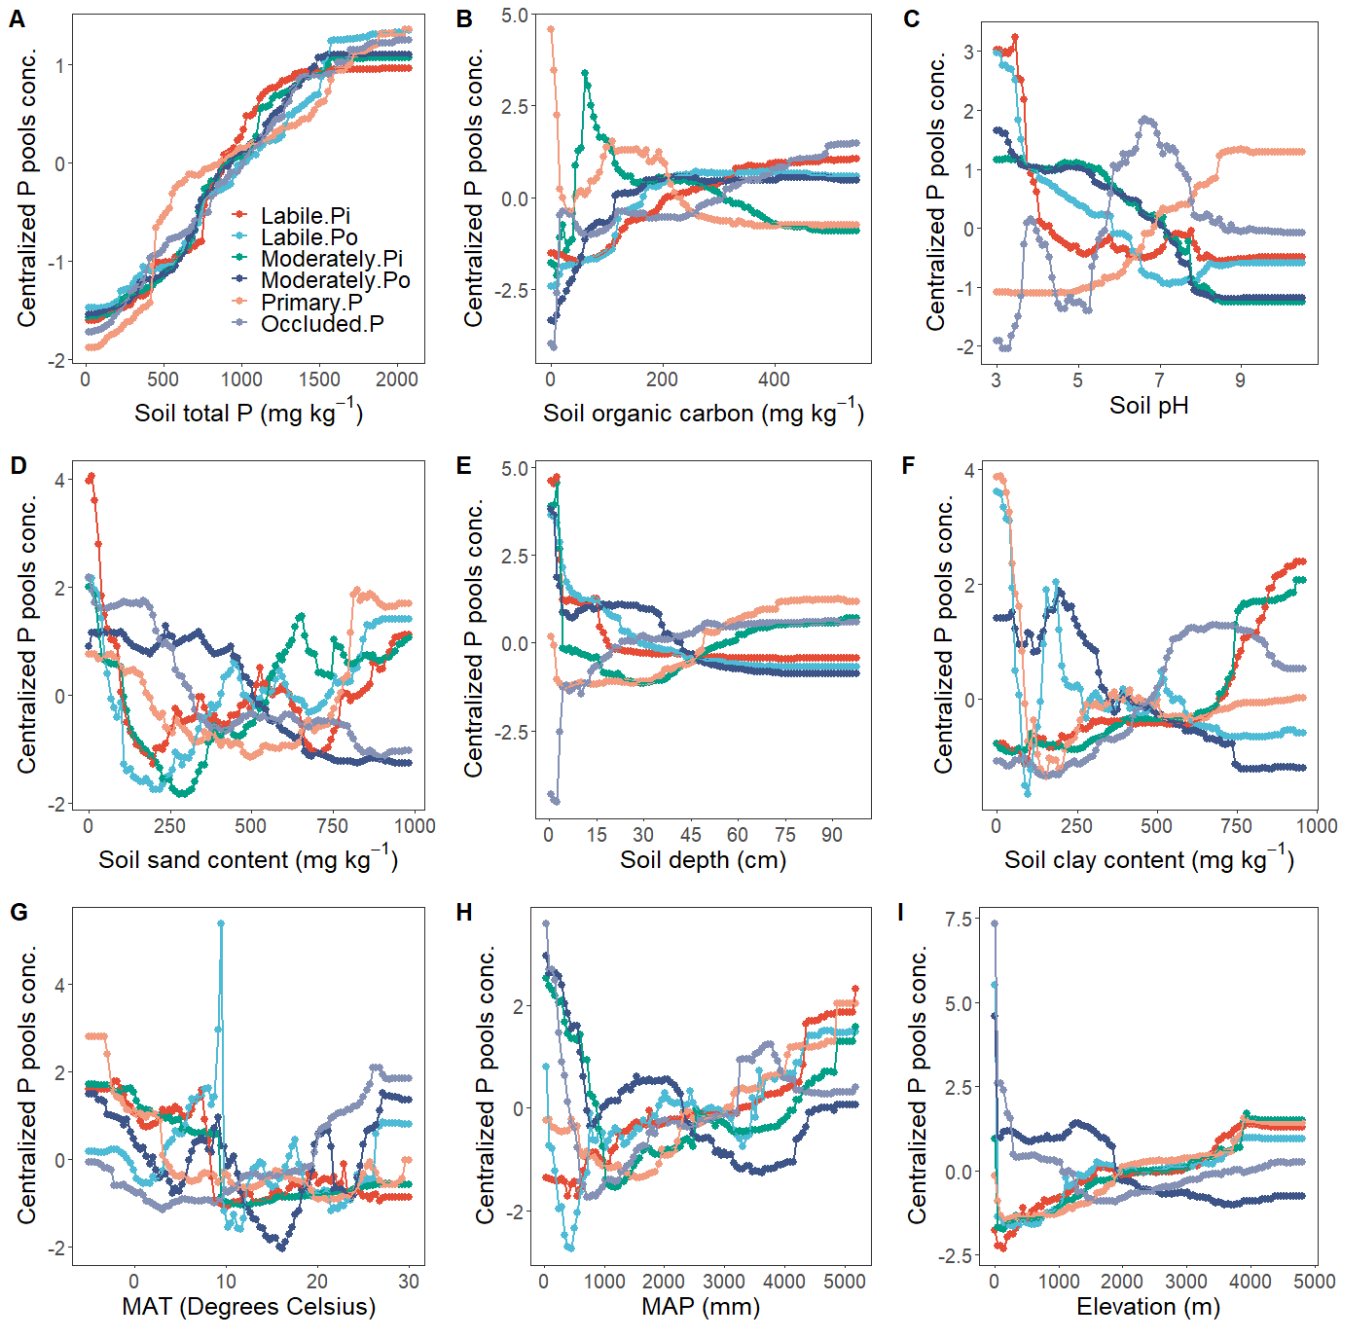

34  
35  
36

37 **Figure S4. Relative importance of variables for predicting proportions of soil P pools quantified using random forest**  
 38 **models.** Mean decrease accuracy (%IncMSE) indicates the relative importance of each variable for predicting soil P pools.  
 39 SWS: soil weathering stage.

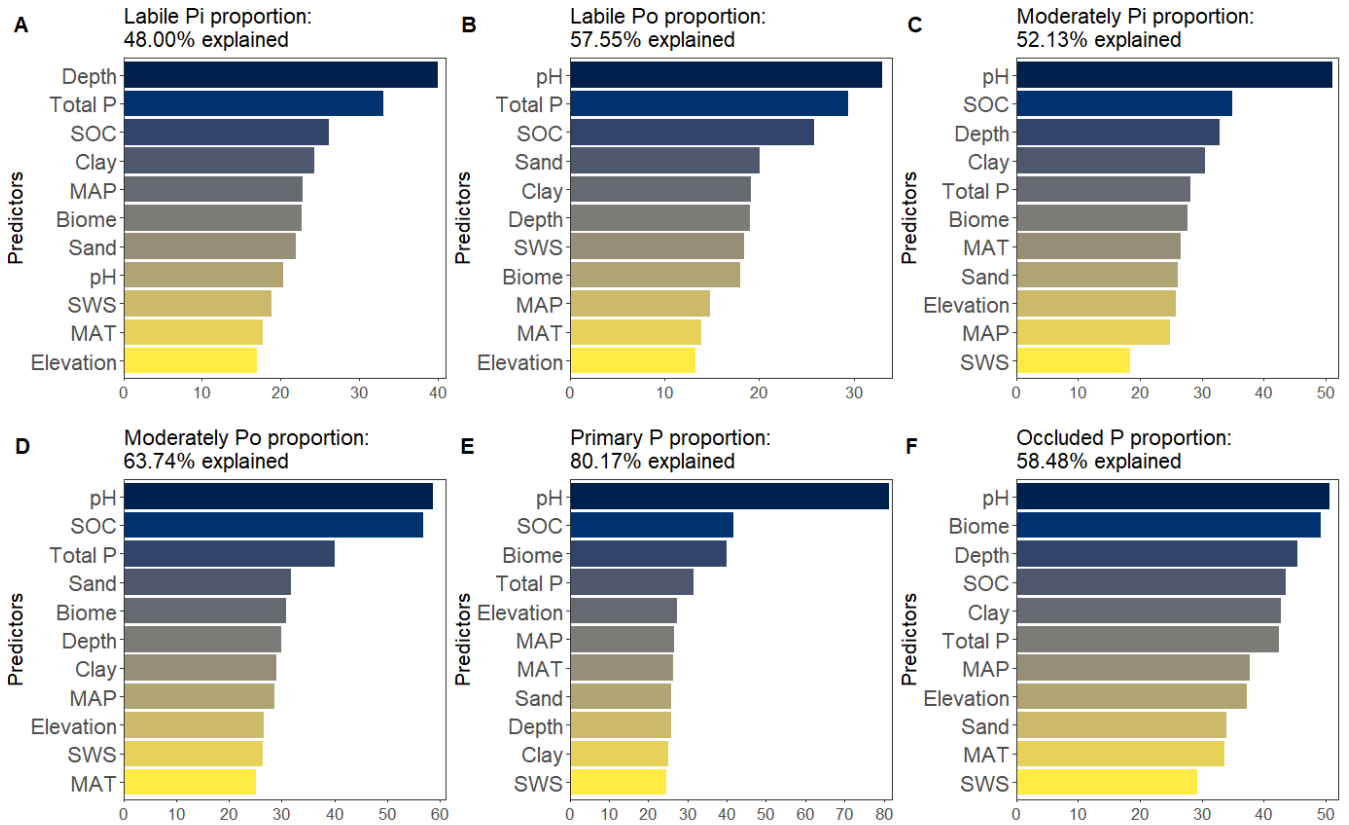

40  
41

42 **Figure S5. Average P pool concentrations and proportions of total P concentration across weathering stage and biome.**  
 43 Labile Po and moderately labile Po are combined into the organic pool. Results based on 1857 observations.

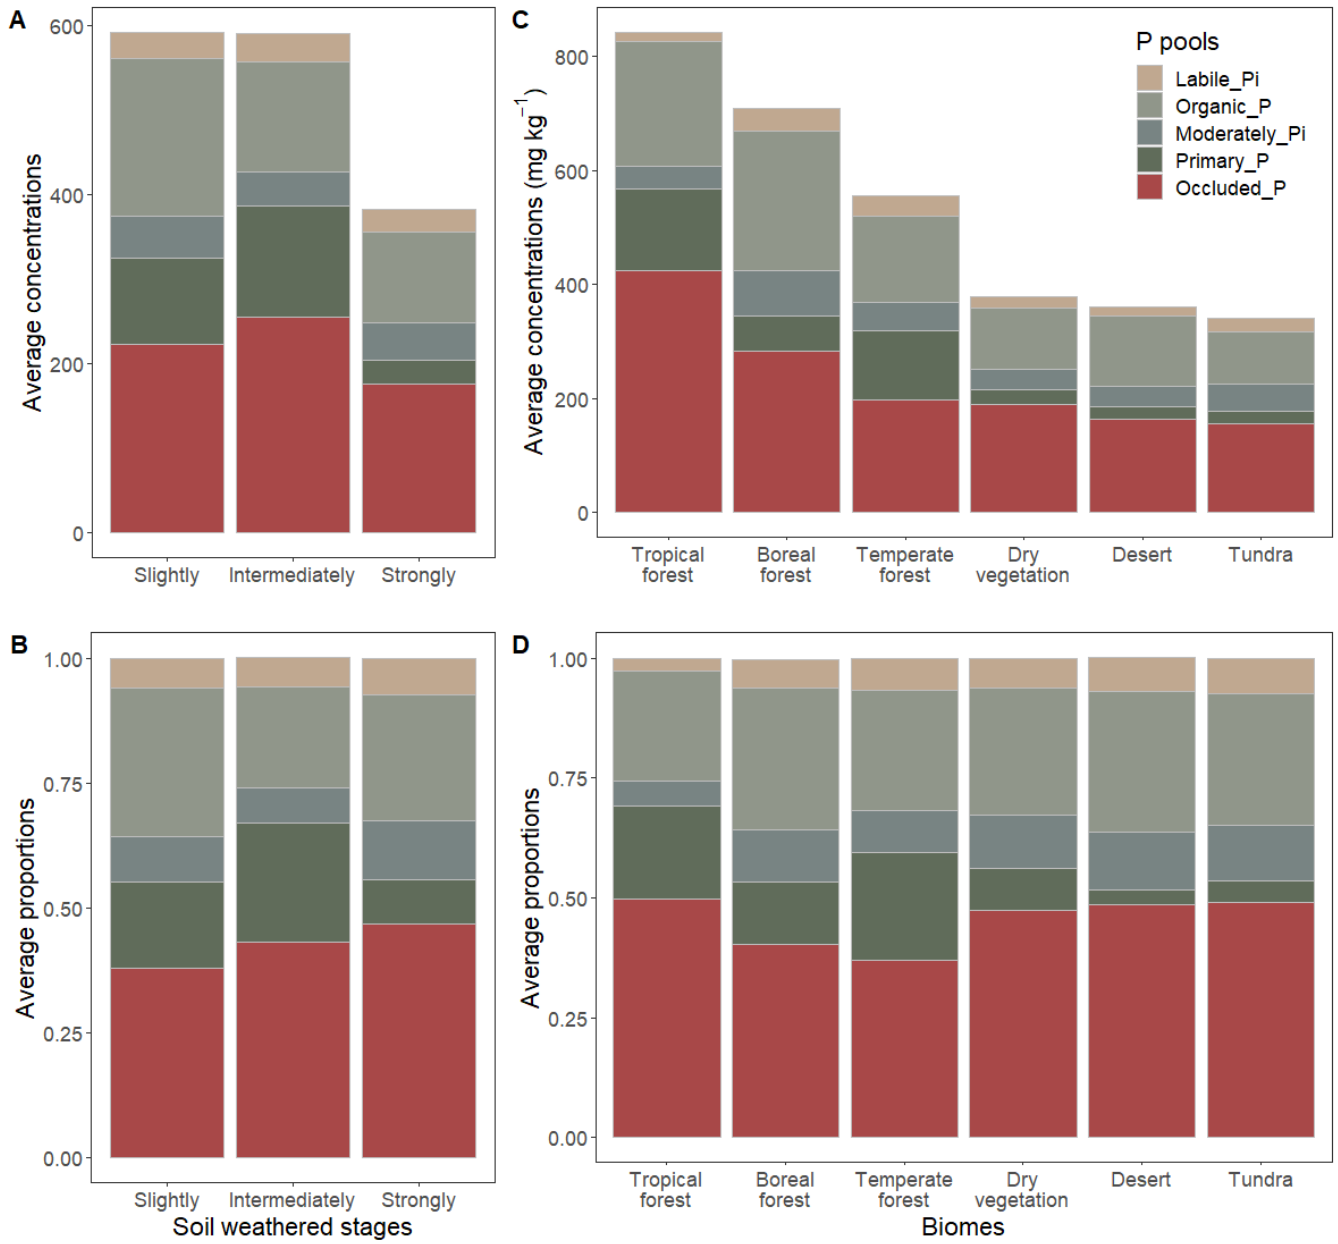

44  
 45  
 46  
 47



48 **Figure S6. Yang et al. (2013)'s predictions of different P pool concentrations.**

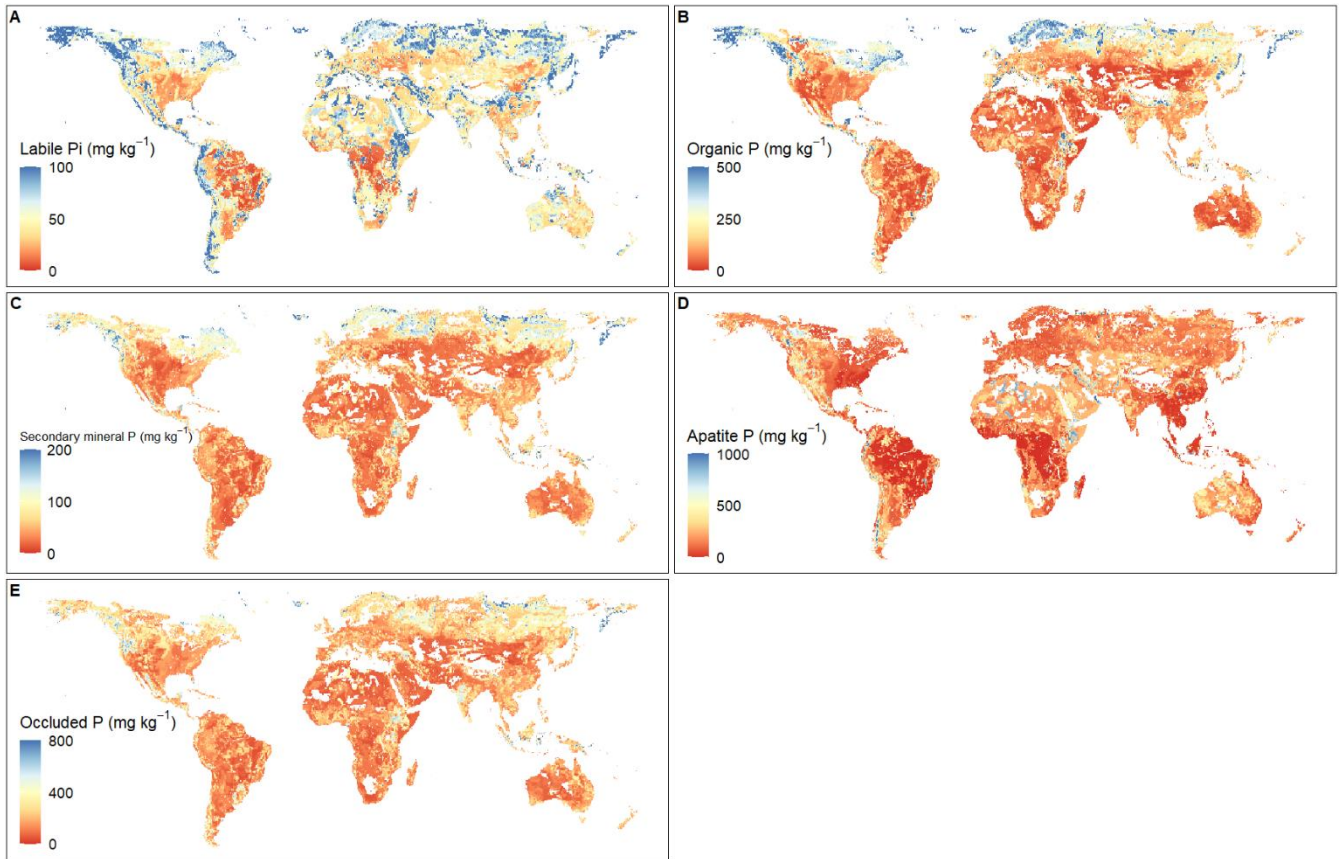

49  
50

## 51 **Supplementary Text 1 Data source references**

### 52 ***Two previous databases:***

- 53 1. Augusto, L., Achat, D.L., Jonard, M., Vidal, D. and Ringeval, B., 2017. Soil parent material—A major driver of plant  
54 nutrient limitations in terrestrial ecosystems. *Global Change Biology*, 23(9): 3808-3824.
- 55 2. Hou, E., Tan, X., Heenan, M. and Wen, D., 2018. A global dataset of plant available and unavailable phosphorus in  
56 natural soils derived by Hedley method. *Scientific Data*, 5(1): 180166.

57

### 58 **Data sources in Laurent et al. (2017):**

- 59 Abekoe, M.K. and Tiessen, H., 1998. Phosphorus forms, lateritic nodules and soil properties along a hillslope in  
60 northern Ghana. *CATENA*, 33(1): 1-15.
- 61 Agbenin, J.O. and Goladi, J.T., 1998. Dynamics of phosphorus fractions in a savanna Alfisol under continuous  
62 cultivation. *Soil Use and Management*, 14(2): 59-64.
- 63 Agbenin, J.O. and Igbokwe, S.O., 2006. Effect of soil–dung manure incubation on the solubility and retention of  
64 applied phosphate by a weathered tropical semi-arid soil. *Geoderma*, 133(3-4): 191-203.
- 65 Aguiar, A.D.C.F., Cândido, C.S., Carvalho, C.S., Monroe, P.H.M. and de Moura, E.G., 2013. Organic matter fraction  
66 and pools of phosphorus as indicators of the impact of land use in the Amazonian periphery. *Ecological Indicators*,  
67 30: 158-164.
- 68 Alamgir, M. and Marschner, P., 2013. Changes in phosphorus pools in three soils upon addition of legume residues  
69 differing in carbon/phosphorus ratio. *Soil Research*, 51: 484-493.
- 70 Almond, P.C. and Tonkin, P.J., 1999. Pedogenesis by upbuilding in an extreme leaching and weathering environment,  
71 and slow loess accretion, south Westland, New Zealand. *Geoderma*, 92(1): 1-36.
- 72 Alt, F., Oelmann, Y., Herold, N., Schrupf, M. and Wilcke, W., 2011. Phosphorus partitioning in grassland and forest  
73 soils of Germany as related to land-use type, management intensity, and land use-related pH. *Journal of Plant*  
74 *Nutrition and Soil Science*, 174(2): 195-209.
- 75 Andersohn, C., 1996. Phosphate cycles in energy crop systems with emphasis on the availability of different phosphate  
76 fractions in the soil. *Plant and Soil*, 184(1): 11-21.
- 77 Aoki, M., Fujii, K. and Kitayama, K., 2012. Environmental Control of Root Exudation of Low-Molecular Weight  
78 Organic Acids in Tropical Rainforests. *Ecosystems*, 15(7): 1194-1203.
- 79 Araújo, M.S.B., Schaefer, C.E.R. and Sampaio, E.V.S.B., 2004. Soil phosphorus fractions from toposequences of  
80 semi-arid Latosols and Luvisols in northeastern Brazil. *Geoderma*, 119(3): 309-321.
- 81 Basamba, T.A., Barrios, E., Amézquita, E., Rao, I.M. and Singh, B.R., 2006. Tillage effects on maize yield in a  
82 Colombian savanna oxisol: Soil organic matter and P fractions. *Soil & Tillage Research*, 91(1): 131-142.
- 83 Basamba, T.A., Barrios, E., Singh, B.R. and Rao, I.M., 2007. Impact of planted fallows and a crop rotation on nitrogen  
84 mineralization and phosphorus and organic matter fractions on a Colombian volcanic-ash soil. *Nutrient Cycling in*  
85 *Agroecosystems*, 77(2): 127-141.
- 86 Bate, D.B., Barrett, J.E., Poage, M.A. and Virginia, R.A., 2008. Soil phosphorus cycling in an Antarctic polar desert.  
87 *Geoderma*, 144(1-2): 21-31.
- 88 Beck, M.A. and Elsenbeer, H., 1999. Biogeochemical cycles of soil phosphorus in southern Alpine spodosols.  
89 *Geoderma*, 91(3): 249-260.
- 90 Beck, M.A.N.C. and Sanchez, P.A., 1996. Soil phosphorus movement and budget after 13 years of fertilized  
91 cultivation in the Amazon basin. *Plant and Soil*, 184(1): 23-31.
- 92 Brandtberg, P.O., Davis, M.R., Clinton, P.W., Condon, L.M. and Allen, R.B., 2010. Forms of soil phosphorus  
93 affected by stand development of mountain beech (*Nothofagus*) forests in New Zealand. *Geoderma*, 157(3): 228-  
94 234.
- 95 Carreira, J.A., Harrison, A.F., Sheppard, L.J. and Woods, C., 1997. Reduced soil P availability in a Sitka spruce (*Picea*  
96 *sitchensis* (Bong.) Carr) plantation induced by applied acid-mist: significance in forest decline. *Forest Ecology and*  
97 *Management*, 92(1-3): 153-166.
- 98 Carrerra, J.A., Lajtha, K. and Niell, F.X., 1997. Phosphorus transformations along a soil/vegetation series of fireprone,  
99 dolomitic, semi-arid shrublands of southern Spain - Soil P and Mediterranean shrubland dynamic.  
100 *Biogeochemistry*, 39(1): 87-120.
- 101 Cassagne, N., Remaury, M., Gauquelin, T. and Fabre, A., 2000. Forms and profile distribution of soil phosphorus in  
102 alpine Inceptisols and Spodosols (Pyrenees, France). *Geoderma*, 95(1): 161-172.
- 103 Chacon, N. and Dezzio, N., 2004. Phosphorus fractions and sorption processes in soil samples taken in a forest-  
104 savanna sequence of the Gran Sabana in southern Venezuela. *Biology and Fertility of Soils*, 40(1): 14-19.
- 105 Chacón, N., Ascanio, M., Herrera, R., Benzo, D. and Flores, S. et al., 2013. Do P Cycling Patterns Differ Between Ice-  
106 Free Areas and Glacial Boundaries in the Maritime Antarctic Region? *Arctic, Antarctic, and Alpine Research*,  
107 45(2): 190-200.
- 108 Noemí Chacón, Nelda Dezzio, MUÑOZ B., RODRÍGUEZ J.M., 2005. Implications of soil organic carbon and the  
109 biogeochemistry of iron and aluminum on soil phosphorus distribution in flooded forests of the lower Orinoco  
110 River, Venezuela. *Biogeochemistry*, 73(3): 555-566.
- 111 Chapuis-Lardy, L., Vanderhoeven, S., Dassonville, N., Koutika, L.S. and Meerts, P., 2006. Effect of the exotic

112 invasive plant *Solidago gigantea* on soil phosphorus status. *Biology and Fertility of Soils*, 42(6): 481-489.

113 Chen, C.R., Condrón, L.M., Davis, M.R. and Sherlock, R.R., 2003. Seasonal changes in soil phosphorus and

114 associated microbial properties under adjacent grassland and forest in New Zealand. *Forest Ecology and*

115 *Management*, 177(1): 539-557.

116 Chindi, A., Esala, M. and Ylivainio, K., 2014. Sequential Fractionation Patterns of Soil Phosphorus Collected from

117 Different Land Use Systems of Dire Inchine District, West Shawa Zone, Ethiopia. *American-Eurasian Journal of*

118 *Scientific Research*, 9: 51-57.

119 Chiu, C., Pai, C. and Yang, K., 2005. Characterization of phosphorus in sub-alpine forest and adjacent grassland soils

120 by chemical extraction and phosphorus-31 nuclear magnetic resonance spectroscopy. *Pedobiologia*, 49(6): 655-663.

121 Cleveland, C.C., Townsend, A.R., Schmidt, S.K. and Constance, B.C., 2003. Soil Microbial Dynamics and

122 Biogeochemistry in Tropical Forests and Pastures, Southwestern Costa Rica. *Ecological Applications*, 13(2): 314-

123 326.

124 Compton, J.E. and Cole, D.W., 2001. Fate and effects of phosphorus additions in soils under N-2-fixing red alder.

125 *Biogeochemistry*, 53(3): 225-247.

126 Condrón, L.M. and Goh, K.M., 1989. Effects of long-term phosphatic fertilizer applications on amounts and forms of

127 phosphorus in soils under irrigated pasture in New Zealand. *Journal of Soil Science*, 40(2): 383-395.

128 Condrón, L.M., Cornforth, I.S., Davis, M.R. and Newman, R.H., 1996. Influence of conifers on the forms of

129 phosphorus in selected New Zealand grassland soils. *Biology and Fertility of Soils*, 21(1-2): 37-42.

130 Crews, T.E., 1996. The supply of phosphorus from native, inorganic phosphorus pools in continuously cultivated

131 Mexican agroecosystems. *Agriculture, Ecosystems & Environment*, 57(2): 197-208.

132 Crews, T.E. and Brookes, P.C., 2014. Changes in soil phosphorus, perennials versus annuals. *Agriculture, Ecosystems*

133 *and Environment*, 184: 168-181.

134 Cross, A.F. and Schlesinger, W.H., 2001. Biological and Geochemical Controls on Phosphorus Fractions in Semiarid

135 Soils. *Biogeochemistry*, 52(2): 155-172.

136 Da Rosa Couto, R., Santos, M.D., Comin, J.J., Pittol Martini, L.C. and Gatiboni, L.C. et al., 2015. Environmental

137 Vulnerability and Phosphorus Fractions of Areas with Pig Slurry Applied to the Soil. *Journal of Environmental*

138 *Quality*, 44(1): 162-173.

139 De Schrijver, A., Vesterdal, L., Hansen, K., De Frenne, P. and Augusto, L. et al., 2012. Four decades of post-

140 agricultural forest development have caused major redistributions of soil phosphorus fractions. *Oecologia*, 169(1):

141 221-234.

142 Derry, D.D., Voroney, R.P. and Briceño, J.A., 2005. Long-term effects of short-fallow on soil phosphorus pools in

143 Costa Rica. *Agriculture, Ecosystems & Environment*, 110(1-2): 91-103.

144 Dieter, D., Elsenbeer, H. and Turner, B.L., 2010. Phosphorus fractionation in lowland tropical rainforest soils in

145 central Panama. *CATENA*, 82(2): 118-125.

146 Dobermann, A., George, T. and Thevs, N., 2002. Phosphorus Fertilizer Effects on Soil Phosphorus Pools in Acid

147 Upland Soils. *Soil Science Society of America Journal*, 66(2): 652-660.

148 Dockersmith, I.C.D.U., Giardina, C.P. and Sanford, R.L.J., 1999. Persistence of tree related patterns in soil nutrients

149 following slash-and-burn disturbance in the tropics. *Plant and Soil*, 209(1): 137-156.

150 Dormaar, J.F. and Willms, W.D., 2000. A comparison of soil chemical characteristics in modified rangeland

151 communities. *Journal of Range Management*, 53: 453-458.

152 Dossa, E.L., Diedhiou, S., Compton, J.E., Assigbetse, K.B. and Dick, R.P., 2010. Spatial patterns of P fractions and

153 chemical properties in soils of two native shrub communities in Senegal. *Plant and Soil*, 327(1/2): 185-198.

154 Duffera, M. and Robarge, W.P., 1996. Characterization of organic and inorganic phosphorus in the highland plateau

155 soils of Ethiopia. *Communications in Soil Science and Plant Analysis*, 27(15-17): 2799-2814.

156 Esberg, C., Dutoit, B., Olsson, R., Ilstedt, U. and Giesler, R. et al., 2010. Microbial responses to P addition in six South

157 African forest soils. *Plant and Soil*, 329(1/2): 209-225.

158 Fabre, A., Gauquelin, T., Vilasante, F., Ortega, A. and Puig, H., 2006. Phosphorus content in five representative

159 landscape units of the Lomas de Arequipa (Atacama Desert-Peru). *CATENA*, 65(1): 80-86.

160 Fabre, A., Pinay, G. and Ruffinoni, C., 1996. Seasonal changes in inorganic and organic phosphorus in the soil of a

161 riparian forest. *Biogeochemistry*, 35(3): 419-432.

162 Fan, J., Wang, J., Hu, X. and Chen, F., 2014. Seasonal dynamics of soil nitrogen availability and phosphorus fractions

163 under urban forest remnants of different vegetation communities in Southern China. *Urban Forestry & Urban*

164 *Greening*, 13(3): 576-585.

165 Finzi, A.C., 2009. Decades of atmospheric deposition have not resulted in widespread phosphorus limitation or

166 saturation of tree demand for nitrogen in southern New England. *Biogeochemistry*, 92(3): 217-229.

167 Frizano, J., Johnson, A.H., Vann, D.R. and Scatena, F.N., 2002. Soil Phosphorus Fractionation during Forest

168 Development on Landslide Scars in the Luquillo Mountains, Puerto Rico. *Biotropica*, 34(1): 17-26.

169 Frizano, J., Vann, D.R., Johnson, A.H., Johnson, C.M. and Vieira, I.C.G. et al., 2003. Labile Phosphorus in Soils of

170 Forest Fallows and Primary Forest in the Bragantina Region, Brazil. *Biotropica*, 35(1): 2-11.

171 Galang, M.A., Markewitz, D. and Morris, L.A., 2010. Soil phosphorus transformations under forest burning and

172 laboratory heat treatments. *Geoderma*, 155(3): 401-408.

- 173 Gleason, S.M., Read, J., Ares, A. and Metcalfe, D.J., 2009. Phosphorus economics of tropical rainforest species and  
174 stands across soil contrasts in Queensland, Australia: understanding the effects of soil specialization and trait  
175 plasticity. *Functional Ecology*, 23(6): 1157-1166.
- 176 Graham, S.A., Craft, C.B., McCormick, P.V. and Aldous, A., 2005. Forms And Accumulation Of Soil P In Natural  
177 And Recently Restored Peatlands--Upper Klamath Lake, Oregon, USA. *Wetlands (Wilmington, N.C.)*, 25(3): 594-  
178 606.
- 179 Gressel, N., McColl, J.G., Preston, C.M., Newman, R.H. and Powers, R.F., 1996. Linkages between phosphorus  
180 transformations and carbon decomposition in a forest soil. *Biogeochemistry*, 33(2): 97-123.
- 181 Gundale, M.J., Sutherland, S. and DeLuca, T.H., 2008. Fire, native species, and soil resource interactions influence the  
182 spatio-temporal invasion pattern of *Bromus tectorum*. *Ecography*, 31(2): 201-210.
- 183 Hartshorn, A.S., Coetsee, C. and Chadwick, O.A., 2009. Pyromineralization of soil phosphorus in a South African  
184 savanna. *Chemical Geology*, 267(1-2): 24-31.
- 185 Heinrich, P.A. and Patrick, J.W., 1985. Phosphorus acquisition in the soil-root system of *Eucalyptus pilularis* Sm.  
186 seedlings. I. Characteristics of the soil system. *Soil Research*, 23(2): 223.
- 187 Hinojosa, M.B., Parra, A., Ramírez, D.A., Carreira, J.A. and García-Ruiz, R. et al., 2012. Effects of drought on soil  
188 phosphorus availability and fluxes in a burned Mediterranean shrubland. *Geoderma*, 191: 61-69.
- 189 Ilstedt, U., 2003. Changes in soil chemical and microbial properties after a wildfire in a tropical rainforest in Sabah,  
190 Malaysia. *Soil Biology and Biochemistry*, 35(8): 1071-1078.
- 191 Imai, N., Kitayama, K. and Titin, J., 2010. Distribution of phosphorus in an above-to-below-ground profile in a  
192 Bornean tropical rain forest. *Journal of tropical ecology*, 26(6): 627-636.
- 193 Ivanoff, D.B.U.O., Reddy, K.R. and Robinson, S., 1998. Chemical fractionation of organic phosphorus in selected  
194 histosols. *Soil Science*, 163(1): 36-45.
- 195 Khan, K.S. and Joergensen, R.G., 2012. Relationships between P fractions and the microbial biomass in soils under  
196 different land use management. *Geoderma*, 173-174: 274-281.
- 197 Kitayama, K., Aiba, S., Takyu, M., Majalap, N. and Wagai, R., 2004. Soil Phosphorus Fractionation and Phosphorus-  
198 Use Efficiency of a Bornean Tropical Montane Rain Forest During Soil Aging With Podzolization. *Ecosystems*,  
199 7(3): 259-274.
- 200 Kolahchi, Z. and Jalali, M., 2012. Speciation of Phosphorus in Phosphorus-Amended and Leached Calcareous Soils  
201 Using Chemical Fractionation. *Polish Journal Environmental Study*, 21(2): 395-400.
- 202 Kramer, S. and Green, D.M., 1999. Phosphorus Pools in Tree and Intercanopy Microsites of a Juniper-Grass  
203 Ecosystem. *Soil Science Society of America journal*, 63(6): 1901-1905.
- 204 Kristiansen, S.M., Amelung, W. and Zech, W., 2001. Phosphorus forms as affected by abandoned anthills (*Formica*  
205 *polyctena* Förster) in forest soils: sequential extraction and liquid-state<sup>31</sup>P-NMR spectroscopy. *Journal of Plant*  
206 *Nutrition and Soil Science*, 164(1): 49-55.
- 207 Kruse, J. and Leinweber, P., 2008. Phosphorus in sequentially extracted fen peat soils: A K-edge X-ray absorption  
208 near-edge structure (XANES) spectroscopy study. *Journal of Plant Nutrition and Soil Science*, 171(4): 613-620.
- 209 Kuczak, C.N., Fernandes, E.C.M., Lehmann, J., Rondon, M.A. and Luizão, F.J., 2006. Inorganic and organic  
210 phosphorus pools in earthworm casts (*Glossoscolecidae*) and a Brazilian rainforest Oxisol. *Soil Biology and*  
211 *Biochemistry*, 38(3): 553-560.
- 212 Kunito, T., Tsunekawa, M., Yoshida, S., Park, H. and Toda, H. et al., 2012. Soil Properties Affecting Phosphorus  
213 Forms and Phosphatase Activities in Japanese Forest Soils. *Soil Science*, 177(1): 39-46.
- 214 Lee, D., Han, X.G. and Jordan, C.F., 1990. Soil phosphorus fractions, aluminum, and water retention as affected by  
215 microbial activity in an Ultisol. *Plant and Soil*, 121(1): 125-136.
- 216 Levy, E.T. and Aschlesinger, W.H., 1999. A comparison of fractionation methods for forms of phosphorus in soils.  
217 *Biogeochemistry*, 47(1): 25-38.
- 218 Li, H., Shen, J., Zhang, F., Clairotte, M. and Drevon, J.J. et al., 2008. Dynamics of phosphorus fractions in the  
219 rhizosphere of common bean (*Phaseolus vulgaris* L.) and durum wheat (*Triticum turgidum durum* L.) grown in  
220 monocropping and intercropping systems. *Plant and Soil*, 312(1/2): 139-150.
- 221 Lilienfein, J., Wilcke, W., Ayarza, M.A., Vilela, L. and Do Carmo Lima, S. et al., 2000. Chemical fractionation of  
222 phosphorus, sulphur, and molybdenum in Brazilian savannah Oxisols under different land use. *Geoderma*, 96(1):  
223 31-46.
- 224 Litaor, M.I., Reichmann, O., Auerswald, K., Haim, A. and Shenker, M., 2004. The Geochemistry of Phosphorus in  
225 Peat Soils of a Semiarid Altered Wetland. *Soil Science Society of America Journal*, 68(6): 2078-2085.
- 226 Litaor, M.I., Seastedt, T.R., Walker, M.D., Carbone, M. and Townsend, A., 2005. The biogeochemistry of phosphorus  
227 across an alpine topographic/snow gradient. *Geoderma*, 124(1): 49-61.
- 228 Liu, Q., Loganathan, P., Hedley, M.J. and Skinner, M.F., 2004. The mobilisation and fate of soil and rock phosphate in  
229 the rhizosphere of ectomycorrhizal *Pinus radiata* seedlings in an Allophanic soil. *Plant and soil*, 264(1/2): 219-229.
- 230 López-Hernández, D., Araujo, Y., López, A., Hernández-Valencia, I. and Hernández, C., 2004. Changes in Soil  
231 Properties and Earthworm Populations Induced By Long-Term Organic Fertilization of A Sandy Soil in the  
232 Venezuelan Amazonia. *Soil Science*, 169(3): 188-194.
- 233 López-Piñeiro, A., Cabrera, D., Peña, D., Albarrán, A. and Rato Nunes, J.M., 2009. Phosphorus Adsorption and

- 234 Fractionation in a Two-phase Olive Mill Waste Amended Soil. *Soil Science Society of America journal*, 73(5):  
 235 1539-1544.
- 236 Magid, J., 1993. Vegetation effects on phosphorus fractions in set-aside soils. *Plant and Soil*, 149(1): 111-119.
- 237 Makarov, M.I., Malysheva, T.I., Vladychenskii, A.S. and Zech, W., 2002. Phosphorus compounds in primitive soils on  
 238 mantle loam under various phytocenoses. *Eurasian Soil Science*, 35: 924-933.
- 239 Makarov, M.I., Volkov, A.V., Malysheva, T.I. and Onipchenko, V.G., 2001. Phosphorus, nitrogen, and carbon in the  
 240 soil of subalpine and alpine altitudinal belts of the Teberda Nature Reserve. *Eurasian soil science*, 34(1): 52-60.
- 241 Markewitz, D., Figueiredo, R.D.O., de Carvalho, C.J.R. and Davidson, E.A., 2012. Soil and tree response to P  
 242 fertilization in a secondary tropical forest supported by an Oxisol. *Biology and Fertility of Soils*, 48(6): 665-678.
- 243 McGrath, D.A., Duryea, M.L. and Cropper, W.P., 2001. Soil phosphorus availability and fine root proliferation in  
 244 Amazonian agroforests 6 years following forest conversion. *Agriculture, Ecosystems & Environment*, 83(3): 271-  
 245 284.
- 246 McKenzie, R.H., Stewart, J.W.B., Dormaar, J.F. and Schaalje, G.B., 1992a. Long-term crop rotation and fertilizer  
 247 effects on phosphorus transformations: I. In a Chernozemic soil. *Canadian Journal of Soil Science*, 72(4): 569-579.
- 248 McKenzie, R.H., Stewart, J.W.B., Dormaar, J.F. and Schaalje, G.B., 1992b. Long-term crop rotation and fertilizer  
 249 effects on phosphorus transformations: II. In a Luvisolic soil. *Canadian Journal of Soil Science*, 72(4): 581-589.
- 250 Meason, D.F., Idol, T.W., Friday, J.B. and Scowcroft, P.G., 2009. Effects of fertilisation on phosphorus pools in the  
 251 volcanic soil of a managed tropical forest. *Forest Ecology and Management*, 258(10): 2199-2206.
- 252 Menzies, N.W., Skilton, J.A. and Guppy, C.N., 1999. Phosphorus Storage on Effluent Irrigated Land. *Journal of*  
 253 *Environmental Quality*, 28(3): 750-754.
- 254 Miller, A.J., Schuur, E.A.G. and Chadwick, O.A., 2001. Redox control of phosphorus pools in Hawaiian montane  
 255 forest soils. *Geoderma*, 102(3-4): 219-237.
- 256 Mirabello, M.J., Yavitt, J.B., Garcia, M., Harms, K.E. and Turner, B.L. et al., 2013. Soil phosphorus responses to  
 257 chronic nutrient fertilisation and seasonal drought in a humid lowland forest, Panama. *Soil Research*, 51(3): 215.
- 258 Neufeldt, H., Da Silva, J.E., Ayarza, M.A. and Zech, W., 2000. Land-use effects on phosphorus fractions in Cerrado  
 259 oxisols. *Biology and Fertility of Soils*, 31(1): 30-37.
- 260 Nwoke, O.C., Vanlauwe, B., Diels, J., Sanginga, N. and Osonubi, O. et al., 2003. Assessment of labile phosphorus  
 261 fractions and adsorption characteristics in relation to soil properties of West African savanna soils. *Agriculture,*  
 262 *Ecosystems & Environment*, 100(2-3): 285-294.
- 263 Oberson, A., Friesen, D.K., Rao, I.M., Bühler, S. and Frossard, E., 2001. Phosphorus Transformations in an Oxisol  
 264 under contrasting land-use systems: The role of the soil microbial biomass. *Plant and Soil*, 237(2): 197-210.
- 265 O'Halloran, I.P., Stewart, J.W.B. and De Jong, E., 1987. Changes in P forms and availability as influenced by  
 266 management practices. *Plant and Soil*, 100(1-3): 113-126.
- 267 Paré, D. and Bernier, B., 1989. Origin of the phosphorus deficiency observed in declining sugar maple stands in the  
 268 Quebec Appalachians. *Canadian Journal of Forest Research*, 19: 24-34.
- 269 Pätzold, S., Hejman, M., Barej, J. and Schellberg, J., 2013. Soil phosphorus fractions after seven decades of fertilizer  
 270 application in the Rengen Grassland Experiment. *Journal of Plant Nutrition and Soil Science*, 176(6): 910-920.
- 271 Perroni, Y., García-Oliva, F., Tapia-Torres, Y. and Souza, V., 2014. Relationship between soil P fractions and  
 272 microbial biomass in an oligotrophic grassland-desert scrub system. *Ecological Research*, 29(3): 463-472.
- 273 Quesada, C.A., Lloyd, J., Schwarz, M., Patiño, S. and Baker, T.R. et al., 2010. Variations in chemical and physical  
 274 properties of Amazon forest soils in relation to their genesis. *Biogeosciences*, 7(5): 1515-1541.
- 275 Radersma, S. and Grierson, P.F., 2004. Phosphorus mobilization in agroforestry: Organic anions, phosphatase activity  
 276 and phosphorus fractions in the rhizosphere. *Plant and Soil*, 259(1/2): 209-219.
- 277 Redel, Y., Rubio, R., Godoy, R. and Borie, F., 2008. Phosphorus fractions and phosphatase activity in an Andisol  
 278 under different forest ecosystems. *Geoderma*, 145(3-4): 216-221.
- 279 Requejo, M.I. and Eichler-Löbermann, B., 2014. Organic and inorganic phosphorus forms in soil as affected by long-  
 280 term application of organic amendments. *Nutrient Cycling in Agroecosystems*, 100(2): 245-255.
- 281 Requena, N., Jimenez, I.C., Toro, M. and Barea, J.M., 1997. Interactions between plant-growth-promoting  
 282 rhizobacteria (PGPR), arbuscular mycorrhizal fungi and *Rhizobium* spp. in the rhizosphere of *Anthyllis cytisoides*,  
 283 a model legume for revegetation in mediterranean semi-arid ecosystems. *New Phytologist*, 136(4): 667-677.
- 284 Resende, J.C.F., Markewitz, D., Klink, C.A., Bustamante, M.M.D.C. and Davidson, E.A., 2011. Phosphorus cycling in  
 285 a small watershed in the Brazilian Cerrado: impacts of frequent burning. *Biogeochemistry*, 105(1-3): 105-118.
- 286 Richter, D.D., Allen, H.L., Li, J., Markewitz, D. and Raikes, J., 2006. Bioavailability of slowly cycling soil  
 287 phosphorus: major restructuring of soil P fractions over four decades in an aggrading forest. *Oecologia*, 150(2):  
 288 259-271.
- 289 Rückamp, D., Amelung, W., Theisz, N., Bandeira, A.G. and Martius, C., 2010. Phosphorus forms in Brazilian termite  
 290 nests and soils: Relevance of feeding guild and ecosystems. *Geoderma*, 155(3-4): 269-279.
- 291 Saá, A., Trasar-Cepeda, M.C. and Carballas, T., 1998. Soil P status and phosphomonoesterase activity of recently  
 292 burnt and unburnt soil following laboratory incubation. *Soil Biology and Biochemistry*, 30(3): 419-428.
- 293 Saltali, K., Kılıç, K. and Koçyigit, R., 2007. Changes in Sequentially Extracted Phosphorus Fractions in Adjacent  
 294 Arable and Grassland Ecosystems. *Arid Land Research and Management*, 21(1): 81-89.

- 295 Satti, P., Mazzarino, M.J., Roselli, L. and Crego, P., 2007. Factors affecting soil P dynamics in temperate volcanic  
 296 soils of southern Argentina. *Geoderma*, 139(1-2): 229-240.
- 297 Schlichting, A. and Leinweber, P., 2002. Effects of pretreatment on sequentially-extracted phosphorus fractions from  
 298 peat soils. *Communications in Soil Science and Plant Analysis*, 33(9-10): 1617-1627.
- 299 Schlichting, A., Leinweber, P., Meissner, R. and Altermann, M., 2002. Sequentially extracted phosphorus fractions in  
 300 peat-derived soils. *Journal of plant nutrition and soil science*, 165(3): 290-298.
- 301 Schoenau, J.J., Stewart, J.W.B. and Bettany, J.R., 1989. Forms and cycling of phosphorus in prairie and boreal forest  
 302 soils. *Biogeochemistry*, 8(3).
- 303 Scott, D.A. and Bliss, C.M., 2012. Phosphorus Fertilizer Rate, Soil P Availability, and Long-Term Growth Response  
 304 in a Loblolly Pine Plantation on a Weathered Ultisol. *Forests*, 3(4): 1071-1085.
- 305 Scott, J.T. and Condon, L.M., 2003. Dynamics and availability of phosphorus in the rhizosphere of a temperate  
 306 silvopastoral system. *Biology and Fertility of Soils*, 39(2): 65-73.
- 307 Selmants, P.C. and Hart, S.C., 2010. Phosphorus and soil development: Does the Walker and Syers model apply to  
 308 semiarid ecosystems? *Ecology*, 91(2): 474-484.
- 309 Sharpley, A.N., Jones, C.A., Gray, C., Cole, C.V. and Tiessen, H. et al., 1985. A detailed phosphorus characterization  
 310 of seventy-eight soils. In, p. 30, US Department of Agriculture, Agricultural Research Service.
- 311 Sharpley, A.N., McDowell, R.W. and Kleinman, P.J.A., 2004. Amounts, Forms, and Solubility of Phosphorus in Soils  
 312 Receiving Manure. *Soil Science Society of America Journal*, 68(6): 2048-2057.
- 313 Sheklabadi, M., Mahmoudzadeh, H., Mahboubi, A.A., Gharabaghi, B. and Ahrens, B., 2014. Land use effects on  
 314 phosphorus sequestration in soil aggregates in western Iran. *Environmental Monitoring and Assessment*, 186(10):  
 315 6493-6503.
- 316 Sherman, J., Fernandez, I.J., Norton, S.A., Ohno, T. and Rustad, L.E., 2006. Soilaluminum, Iron, and Phosphorus  
 317 Dynamics in Response to Long-Term Experimental Nitrogen and Sulfur Additions at the Bear Brook Watershed in  
 318 Maine, USA. *Environmental Monitoring and Assessment*, 121(1-3): 421-429.
- 319 Shiels, A.B. and Sanford, R.L., 2001. Soil nutrient differences between two krummholz-form tree species and adjacent  
 320 alpine tundra. *Geoderma*, 102(3): 205-217.
- 321 Simas, F.N.B., Schaefer, C.E.G.R., Melo, V.F., Albuquerque-Filho, M.R. and Michel, R.F.M. et al., 2007.  
 322 Ornithogenic cryosols from Maritime Antarctica: Phosphatization as a soil forming process. *Geoderma*, 138(3):  
 323 191-203.
- 324 Slazak, A., Freese, D., Da Silva Matos, E. and Hüttl, R.F., 2010. Soil organic phosphorus fraction in pine-oak forest  
 325 stands in Northeastern Germany. *Geoderma*, 158(3): 156-162.
- 326 Solomon, D. and Lehman N., J., 2000. Loss of phosphorus from soil in semi-arid northern Tanzania as a result of  
 327 cropping: evidence from sequential extraction and  $^{31}\text{P}$ -NMR spectroscopy. *European Journal of*  
 328 *Soil Science*, 51(4): 699-708.
- 329 Solomon, D., Lehmann, J., Mamo, T., Fritzsche, F. and Zech, W., 2002. Phosphorus forms and dynamics as influenced  
 330 by land use changes in the sub-humid Ethiopian highlands. *Geoderma*, 105(1): 21-48.
- 331 Spears, J.D.H., Lajtha, K., Caldwell, B.A., Pennington, S.B. and Vanderbilt, K., 2001. Species effects of *Ceanothus*  
 332 *velutinus* versus *Pseudotsuga menziesii*, Douglas-fir, on soil phosphorus and nitrogen properties in the Oregon  
 333 cascades. *Forest Ecology and Management*, 149(1-3): 205-216.
- 334 Suarez, E.R., Pelletier, D.M., Fahey, T.J., Groffman, P.M. and Bohlen, P.J. et al., 2004. Effects of Exotic Earthworms  
 335 on Soil Phosphorus Cycling in Two Broadleaf Temperate Forests. *Ecosystems*, 7(1): 28-44.
- 336 Sugihara, S., Shibata, M., Mvondo Ze, A.D., Araki, S. and Funakawa, S., 2014. Effect of vegetation on soil C, N, P  
 337 and other minerals in Oxisols at the forest-savanna transition zone of central Africa. *Soil Science and Plant*  
 338 *Nutrition*, 60(1): 45-59.
- 339 Sui, Y., Thompson, M.L. and Shang, C., 1999. Fractionation of Phosphorus in a Mollisol Amended with Biosolids.  
 340 *Soil Science Society of America Journal*, 63(5): 1174-1180.
- 341 Sun, H., Wu, Y., Yu, D. and Zhou, J., 2013. Altitudinal gradient of microbial biomass phosphorus and its relationship  
 342 with microbial biomass carbon, nitrogen, and rhizosphere soil phosphorus on the eastern slope of Gongga  
 343 Mountain, SW China. *PLoS One*, 8(9): e72952.
- 344 Taranto, M., 2000. Sequential fractionation and characterisation ( $^{31}\text{P}$ -NMR) of phosphorus-amended soils in *Banksia*  
 345 *integrifolia* (L.f.) woodland and adjacent pasture. *Soil Biology and Biochemistry*, 32(2): 169-177.
- 346 Tchienkoua, M. and Zech, W., 2003. Chemical and spectral characterization of soil phosphorus under three land uses  
 347 from an Andic Palehumult in West Cameroon. *Agriculture, Ecosystems & Environment*, 100(2): 193-200.
- 348 Thomas, S.M., Johnson, A.H., Frizano, J., Vann, D.R. and Zarin, D.J. et al., 1999. Phosphorus fractions in montane  
 349 forest soils of the Cordillera de Piuchué, Chile: biogeochemical implications. *Plant and soil*, 211(2): 139-148.
- 350 Tiessen, H., Salcedo, I.H. and Sampaio, E.V.S.B., 1992. Nutrient and soil organic matter dynamics under shifting  
 351 cultivation in semi-arid northeastern Brazil. *Agriculture, Ecosystems & Environment*, 38(3): 139-151.
- 352 Townsend, A.R., 2002. Unexpected changes in soil phosphorus dynamics along pasture chronosequences in the humid  
 353 tropics. *Journal of Geophysical Research*, 107(D20): LBA 34-1-LBA 34-9.
- 354 Trasar-Cepeda, M.C., Gil-Sotres, F. and Guitian-Ojea, F., 1990. Relation between phosphorus fractions and  
 355 development of soils from Galicia (NW Spain). *Geoderma*, 47(1): 139-150.

- 356 Turrión, M., López, O., Lafuente, F., Mulas, R. and Ruipérez, C. et al., 2007. Soil phosphorus forms as quality  
 357 indicators of soils under different vegetation covers. *Science of The Total Environment*, 378(1): 195-198.
- 358 Valdespino, P., Romualdo, R., Cadenazzi, L. and Campo, J., 2009. Phosphorus cycling in primary and secondary  
 359 seasonally dry tropical forests in Mexico. *Annals of Forest Science*, 66(1): 107-107.
- 360 Viñeola, B., García-Ruiz, R., Liétor, J., Ochoa, V. and Carreira, J.A., 2006. Soil Phosphorus Availability and  
 361 Transformation Rates in Relictic Pinsapo Fir Forests from Southern Spain. *Biogeochemistry*, 78(2): 151-172.
- 362 Vu, D.T., Tang, C. and Armstrong, R.D., 2010. Transformations and availability of phosphorus in three contrasting  
 363 soil types from native and farming systems: A study using fractionation and isotopic labeling techniques. *Journal of*  
 364 *Soils and Sediments*, 10(1): 18-29.
- 365 Wang, G., Bao, K., Yu, X., Zhao, H. and Lin, Q. et al., 2012. Forms and accumulation of soil P in a subalpine peatland  
 366 of Mt. Changbai in Northeast China. *CATENA*, 92: 22-29.
- 367 Wang, G., Liu, J., Wang, J. and Yu, J., 2006. Soil phosphorus forms and their variations in depressional and riparian  
 368 freshwater wetlands (Sanjiang Plain, Northeast China). *Geoderma*, 132(1): 59-74.
- 369 Wang, G., Yu, X., Bao, K., Xing, W. and Gao, C. et al., 2015. Effect of fire on phosphorus forms in Sphagnum moss  
 370 and peat soils of ombrotrophic bogs. *Chemosphere*, 119: 1329-1334.
- 371 Wang, G., Zhai, Z., Liu, J. and Wang, J., 2008. Forms and profile distribution of soil phosphorus in four wetlands  
 372 across gradients of sand desertification in Northeast China. *Geoderma*, 145(1): 50-59.
- 373 Weiss, L., Shiels, A.B. and Walker, L.R., 2005. Soil impacts of bristlecone pine (*Pinus longaeva*) tree islands on alpine  
 374 tundra, Charleston Peak, Nevada. *Western North American Naturalist*, 65: 536-540.
- 375 Wright, R.B., Lockaby, B.G. and Walbridge, M.R., 2001. Phosphorus Availability in an Artificially Flooded  
 376 Southeastern Floodplain Forest Soil. *Soil Science Society of America journal*, 65(4): 1293-1302.
- 377 Xavier, F.A.D.S., Almeida, E.F., Cardoso, I.M. and de Sá Mendonça, E., 2011. Soil phosphorus distribution in  
 378 sequentially extracted fractions in tropical coffee-agroecosystems in the Atlantic Forest biome, Southeastern Brazil.  
 379 *Nutrient Cycling in Agroecosystems*, 89(1): 31-44.
- 380 Xavier, F.A.D.S., de Oliveira, T.S., Andrade, F.V. and de Sá Mendonça, E., 2009. Phosphorus fractionation in a sandy  
 381 soil under organic agriculture in Northeastern Brazil. *Geoderma*, 151(3): 417-423.
- 382 Xu, G., Shao, H., Sun, J. and Chang, S.X., 2012. Phosphorus fractions and profile distribution in newly formed  
 383 wetland soils along a salinity gradient in the Yellow River Delta in China. *Journal of Plant Nutrition and Soil*  
 384 *Science*, 175(5): 721-728.
- 385 Xu, G., Sun, J.N., Xu, R.F., Lv, Y.C. and Shao, H.B. et al., 2011. Effects of air-drying and freezing on phosphorus  
 386 fractions in soils with different organic matter contents. *Plant, Soil and Environment*, 57(No. 5): 228-234.
- 387 Xue, Q.Y., Shamsi, I.H., Sun, D.S., Ostermann, A. and Zhang, Q.C. et al., 2013. Impact of manure application on  
 388 forms and quantities of phosphorus in a Chinese Cambisol under different land use. *Journal of Soils and Sediments*,  
 389 13(5): 837-845.
- 390 Yang, K., Zhu, J., Gu, J., Yu, L. and Wang, Z., 2015. Changes in soil phosphorus fractions after 9 years of continuous  
 391 nitrogen addition in a *Larix gmelinii* plantation. *Annals of Forest Science*, 72(4): 435-442.
- 392 Yavitt, J.B., Harms, K.E., Garcia, M.N., Mirabello, M.J. and Wright, S.J., 2011. Soil fertility and fine root dynamics in  
 393 response to 4 years of nutrient (N, P, K) fertilization in a lowland tropical moist forest, Panama. *Austral Ecology*,  
 394 36(4): 433-445.
- 395 Yu, J., Qu, F., Wu, H., Meng, L. and Du, S. et al., 2014. Soil Phosphorus Forms and Profile Distributions in the Tidal  
 396 River Network Region in the Yellow River Delta Estuary. *The Scientific World Journal*, 2014: 1-11.
- 397 Yu, S., He, Z.L., Stoffella, P.J., Calvert, D.V. and Yang, X.E. et al., 2006. Surface runoff phosphorus (P) loss in  
 398 relation to phosphatase activity and soil P fractions in Florida sandy soils under citrus production. *Soil Biology and*  
 399 *Biochemistry*, 38(3): 619-628.
- 400 Zhang, L., Wu, Y., Wu, N., Luo, P. and Liu, L. et al., 2011. Impacts of Vegetation Type on Soil Phosphorus  
 401 Availability and Fractions near the Alpine Timberline of the Tibetan Plateau. *Polish Journal of Ecology*, 59: 307-  
 402 316.

403  
 404  
 405  
 406 **Data sources in Hou et al. (2018):**

- 407 Alamgir, M., McNeill, A., Tang, C. and Marschner, P., 2012. Changes in soil P pools during legume residue  
 408 decomposition. *Soil Biology and Biochemistry*, 49: 70-77.
- 409 Beck, M.A. and Sanchez, P.A., 1994. Soil Phosphorus Fraction Dynamics during 18 Years of Cultivation on a Typic  
 410 Paleudult. *Soil Science Society of America Journal*, 58(5): 1424-1431.
- 411 Cherubin, M.R., Franco, A.L.C., Cerri, C.E.P., Karlen, D.L. and Pavinato, P.S. et al., 2016. Phosphorus pools  
 412 responses to land-use change for sugarcane expansion in weathered Brazilian soils. *Geoderma*, 265: 27-38.
- 413 Cross, A.F. and Schlesinger, W.H., 2001. Biological and geochemical controls on phosphorus fractions in semiarid  
 414 soils. *Biogeochemistry*, 52(2): 155-172.
- 415 de Oliveira, C.M.B., Erich, M.S., Gatiboni, L.C. and Ohno, T., 2015. Phosphorus fractions and organic matter  
 416 chemistry under different land use on Humic Cambisols in Southern Brazil. *Geoderma Regional*, 5: 140-149.

- 417 Feng, J., Turner, B.L., Lü, X., Chen, Z. and Wei, K. et al., 2016. Phosphorus transformations along a large-scale  
418 climosequence in arid and semiarid grasslands of northern China. *Global Biogeochemical Cycles*, 30(9): 1264-  
419 1275.
- 420 Garcia-Montiel, D.C., Neill, C., Melillo, J., Thomas, S. and Steudler, P.A. et al., 2000. Soil Phosphorus  
421 Transformations Following Forest Clearing for Pasture in the Brazilian Amazon. *Soil Science Society of America  
422 Journal*, 64(5): 1792-1804.
- 423 Giardina, C.P., Sanford, R.L. and Døckersmith, I.C., 2000. Changes in Soil Phosphorus and Nitrogen During Slash-  
424 and-Burn Clearing of a Dry Tropical Forest. *Soil Science Society of America journal*, 64(1): 399-405.
- 425 Giesler, R., Esberg, C., Lagerström, A. and Graae, B.J., 2012. Phosphorus availability and microbial respiration across  
426 different tundra vegetation types. *Biogeochemistry*, 108(1-3): 429-445.
- 427 Guo, H., Zhou, J., Luo, X., Wang, W. and Wu, X., 2012. Phosphorus fractions of Latosols developed from different  
428 parent materials in rubber plantation of Hainan Province. *Chinese Journal of Tropical Crops*, 33: 1724–1730.
- 429 Hashimoto, Y. and Watanabe, Y., 2014. Combined applications of chemical fractionation, solution 31P-NMR and P K-  
430 edge XANES to determine phosphorus speciation in soils formed on serpentine landscapes. *Geoderma*, 230-231:  
431 143-150.
- 432 Hinojosa, M.B., Parra, A., Ramírez, D.A., Carreira, J.A. and García-Ruiz, R. et al., 2012. Effects of drought on soil  
433 phosphorus availability and fluxes in a burned Mediterranean shrubland. *Geoderma*, 191: 61-69.
- 434 Hou, E., Wen, D., Kuang, Y., Cong, J. and Chen, C. et al., 2018. Soil pH predominantly controls the forms of organic  
435 phosphorus in topsoils under natural broadleaved forests along a 2500 km latitudinal gradient. *Geoderma*, 315: 65-  
436 74.
- 437 Izquierdo, J.E., Houlton, B.Z. and van Huysen, T.L., 2013. Evidence for progressive phosphorus limitation over long-  
438 term ecosystem development: Examination of a biogeochemical paradigm. *Plant and Soil*, 367(1-2): 135-147.
- 439 Jien, S., Baillie, I., Hu, C., Chen, T. and Iizuka, Y. et al., 2016. Forms and distribution of phosphorus in a placic  
440 podzolic toposequence in a subtropical subalpine forest, Taiwan. *CATENA*, 140: 145-154.
- 441 Julich, D., Julich, S. and Feger, K., 2017. Phosphorus fractions in preferential flow pathways and soil matrix in  
442 hillslope soils in the Thuringian Forest (Central Germany). *Journal of Plant Nutrition and Soil Science*, 180(3):  
443 407-417.
- 444 Kitayama, K., Majalap-Lee, N. and Aiba, S., 2000. Soil Phosphorus Fractionation and Phosphorus-Use Efficiencies of  
445 Tropical Rainforests along Altitudinal Gradients of Mount Kinabalu, Borneo. *Oecologia*, 123(3): 342-349.
- 446 Lehmann, J., Günther, D., Socorro Da Mota, M., Pereira De Almeida, M. and Zech, W. et al., 2001. Inorganic and  
447 organic soil phosphorus and sulfur pools in an Amazonian multistrata agroforestry system. *Agroforestry systems*,  
448 53(2): 113-124.
- 449 Lilienfein, J., Wilcke, W., Ayarza, M.A., Vilela, L. and Do Carmo Lima, S. et al., 2000. Chemical fractionation of  
450 phosphorus, sulphur, and molybdenum in Brazilian savannah Oxisols under different land use. *Geoderma*, 96(1):  
451 31-46.
- 452 Lin, K., Guo, J., Yang, Z., Ji, S. and Yang, Y., 2014. Soil phosphorus forms and availability in natural regeneration by  
453 man-aided *Castanopsis carlesii* forests. *Journal of Central South University of Forestry & Technology*, 34: 6–11.
- 454 Liptzin, D., Sanford Jr, R.L. and Seastedt, T.R., 2013. Spatial patterns of total and available N and P at alpine treeline.  
455 *Plant and Soil*, 365(1/2): 127-140.
- 456 Lloyd, J., Domingues, T.F., Schrodt, F., Ishida, F.Y. and Feldpausch, T.R. et al., 2015. Edaphic, structural and  
457 physiological contrasts across Amazon Basin forest–savanna ecotones suggest a role for potassium as a key  
458 modulator of tropical woody vegetation structure and function. *Biogeosciences*, 12(22): 6529-6571.
- 459 Lu, X., Zhang, L.J., Wang, R., Zhou, Z.Y. and Tao, X.H. et al., 2012. Characteristics of phosphorus contents in the  
460 rhizosphere soil of different shrubs on sandy grassland in Maqu. *Pratacultural Science*, 29(02): 167-173.
- 461 Maranguit, D., Guillaume, T. and Kuzyakov, Y., 2017. Land-use change affects phosphorus fractions in highly  
462 weathered tropical soils. *CATENA*, 149: 385-393.
- 463 McClintock, M.A., Brocard, G., Willenbring, J., Tamayo, C. and Porder, S. et al., 2015. Spatial variability of African  
464 dust in soils in a montane tropical landscape in Puerto Rico. *Chemical Geology*, 412: 69-81.
- 465 Müller, M., Oelmann, Y., Schickhoff, U., Böhner, J. and Scholten, T., 2017. Himalayan treeline soil and foliar C:N:P  
466 stoichiometry indicate nutrient shortage with elevation. *Geoderma*, 291: 21-32.
- 467 Newbery, D.M., Alexander, I.J. and Rother, J.A., 1997. Phosphorus dynamics in a lowland African rainforest: the  
468 influence of ectomycorrhizal trees. *Ecological Monographs*, 67(3): 367-409.
- 469 Olander, L.P., Bustamante, M.M., Asner, G.P., Telles, E. and Prado, Z. et al., 2005. Surface Soil Changes Following  
470 Selective Logging in an Eastern Amazon Forest. *Earth interactions*, 9(4): 1-19.
- 471 Qin, S., Liu, J., Wang, G. and Zhou, W., 2007. Phosphorus fractions under different land uses in Sanjiang plain.  
472 *Environmental Science*, 28(12): 2777.
- 473 Redel, Y.D., Escudey, M., Alvear, M., Conrad, J. and Borie, F., 2015. Effects of land use change on P bioavailability  
474 determined by chemical fractionation and 31P-NMR spectroscopy in a *Nothofagus* forest and adjacent grassland.  
475 *Journal of Soil Science and Plant Nutrition*: 15(4): 1061-1070.
- 476 Richter, D.D., Allen, H.L., Li, J., Markewitz, D. and Raikes, J., 2006. Bioavailability of slowly cycling soil  
477 phosphorus: major restructuring of soil P fractions over four decades in an aggrading forest. *Oecologia*, 150(2):



- 478 259-271.
- 479 Roberts, T.L., Stewart, J.W.B. and Bettany, J.R., 1985. The influence of topography on the distribution of organic and  
480 inorganic soil phosphorus across a narrow environmental gradient. *Canadian Journal of Soil Science*, 65(4): 651-  
481 665.
- 482 Rückamp, D., Amelung, W., Theisz, N., Bandeira, A.G. and Martius, C., 2010. Phosphorus forms in Brazilian termite  
483 nests and soils: Relevance of feeding guild and ecosystems. *Geoderma*, 155(3): 269-279.
- 484 Schlesinger, W.H., Bruijnzeel, L.A., Bush, M.B., Klein, E.M. and Mace, K.A. et al., 1998. The Biogeochemistry of  
485 Phosphorus after the First Century of Soil Development on Rakata Island, Krakatau, Indonesia. *Biogeochemistry*,  
486 40(1): 37-55.
- 487 Schlichting, A., Leinweber, P., Meissner, R. and Altermann, M., 2002. Sequentially extracted phosphorus fractions in  
488 peat-derived soils. *Journal of Plant Nutrition and Soil Science*, 165(3): 290-298.
- 489 Schoenau, J.J., Stewart, J.W.B. and Bettany, J.R., 1989. Forms and cycling of phosphorus in prairie and boreal forest  
490 soils. *Biogeochemistry*, 8(3): 223-237.
- 491 Szott, L.T. and Melendez, G., 2001. Phosphorus availability under annual cropping, alley cropping, and multistrata  
492 agroforestry systems. *Agroforestry Systems*, 53(2): 125-132.
- 493 Trasar-Cepeda, M.C., Carballas, T., Gil-Sotres, F. and de Blas, E., 1991. Liming and the phosphatase activity and  
494 mineralization of phosphorus in an andic soil. *Soil Biology and Biochemistry*, 23(3): 209-215.
- 495 Turner, B.L. and Laliberté, E., 2015. Soil Development and Nutrient Availability Along a 2 Million-Year Coastal  
496 Dune Chronosequence Under Species-Rich Mediterranean Shrubland in Southwestern Australia. *Ecosystems*,  
497 18(2): 287-309.
- 498 Wang, J., Ren, C., Cheng, H., Zou, Y. and Bughio, M.A. et al., 2017. Conversion of rainforest into agroforestry and  
499 monoculture plantation in China: Consequences for soil phosphorus forms and microbial community. *Science of  
500 The Total Environment*, 595: 769-778.
- 501 Wardle, D.A., Bellingham, P.J., Kardol, P., Giesler, R. and Tanner, E.V.J., 2015. Coordination of aboveground and  
502 belowground responses to local-scale soil fertility differences between two contrasting Jamaican rain forest types.  
503 *Oikos*, 124(3): 285-297.
- 504 Wu, R., Bao, L. and Tiessen, H., 2003. Study on the dynamic of soil phosphorus in the transitional areas of grasslands  
505 and crop fields. *Journal of Plant Nutrition and Fertilizers*, 9: 131-138.
- 506 Wu, Y., Priezel, J., Zhou, J., Bing, H. and Luo, J. et al., 2014. Soil phosphorus bioavailability assessed by XANES  
507 and Hedley sequential fractionation technique in a glacier foreland chronosequence in Gongga Mountain,  
508 Southwestern China. *Science China Earth Sciences*, 57(8): 1860-1868.
- 509 Yang, K., Zhu, J., Gu, J., Yu, L. and Wang, Z., 2015. Changes in soil phosphorus fractions after 9 years of continuous  
510 nitrogen addition in a *Larix gmelinii* plantation. *Annals of Forest Science*, 72(4): 435-442.
- 511 Zhang, J. and Chen, A., 1999. Phosphorus fractions and availability of tropical soil in rubber plantation. *Ecology and  
512 Environmental Sciences*, 8: 284-286.
- 513 Zhou, J., Wu, Y., Bing, H., Yang, Z. and Wang, J. et al., 2016. Variations in soil phosphorus biogeochemistry across  
514 six vegetation types along an altitudinal gradient in SW China. *CATENA*, 142: 102-111.
- 515
- 516
- 517
- 518 **Data sources between 2016 and 08/08/2018:**
- 519 Baumann, K., Glaser, K., Mutz, J., Karsten, U. and MacLennan, A. et al., 2017. Biological soil crusts of temperate  
520 forests: Their role in P cycling. *Soil Biology and Biochemistry*, 109: 156-166.
- 521 Baumann, K., Siebers, M., Kruse, J., Eckhardt, K. and Hu, Y. et al., 2019. Biological soil crusts as key player in  
522 biogeochemical P cycling during pedogenesis of sandy substrate. *Geoderma*, 338: 145-158.
- 523 Brucker, E. and Spohn, M., 2019. Formation of soil phosphorus fractions along a climate and vegetation gradient in the  
524 Coastal Cordillera of Chile. *CATENA*, 180: 203-211.
- 525 Bueis, T., Bravo, F., Pando, V., Kissi, Y. and Turrión, M., 2019. Phosphorus availability in relation to soil properties  
526 and forest productivity in *Pinus sylvestris* L. plantations. *Annals of Forest Science*, 76(4): 97.
- 527 Cai, X., Lin, Z., Penttinen, P., Li, Y. and Li, Y. et al., 2018. Effects of conversion from a natural evergreen broadleaf  
528 forest to a Moso bamboo plantation on the soil nutrient pools, microbial biomass and enzyme activities in a  
529 subtropical area. *Forest Ecology and Management*, 422: 161-171.
- 530 Chen, M., Shu, Y. and Xiao, S., 2019. Methods of soil organic and inorganic phosphorus fractionation in karst areas  
531 (published in Chinese with English abstract). *Journal of Agricultural Resources and Environment*, 36(4): 462-470.
- 532 Chen, Y., Chen, G., Liang, Z., Li, R. and Ma, H. et al., 2018. Ten-year nitrogen addition did not significantly affect  
533 soil phosphorus fractions in a *Pleioblastus amarus* plantation (published in Chinese with English abstract). *Ecology  
534 and Environmental Sciences*, 27(4): 677-684.
- 535 Costa, M., Gama-Rodrigues, A., Gonçalves, J., Gama-Rodrigues, E. and Sales, M. et al., 2016. Labile and Non-Labile  
536 Fractions of Phosphorus and Its Transformations in Soil under Eucalyptus Plantations, Brazil. *Forests*, 7(12): 15.
- 537 Da Silva Coutinho Detmann, K., de Souza Leite, T., de Oliveira Neto, R.R., Delgado, M.N. and Rebello, V.P.A. et al.,  
538 2019. Arbuscular mycorrhizae and absence of cluster roots in the Brazilian Proteaceae *Roupala montana* Aubl.

539 Symbiosis, 77(2): 115-122.

540 Damian, J.M., Firmano, R.F., Cherubin, M.R., Pavinato, P.S. and de Marchi Soares, T. et al., 2020. Changes in soil  
541 phosphorus pool induced by pastureland intensification and diversification in Brazil. *Science of The Total*  
542 *Environment*, 703: 135463.

543 de Souza Oliveira, N., Schiavo, J.A., Laranjeira, L.T., de Moraes, E.M.V. and Lima, M.F. et al., 2021. Forms of  
544 inorganic phosphorus in carbonatic soils in the Pantanal of Mato Grosso do Sul, Brazil. *Soil Research*, 59(7): 737.

545 Fan, Y., Lin, F., Yang, L., Zhong, X. and Wang, M. et al., 2018. Decreased soil organic P fraction associated with  
546 ectomycorrhizal fungal activity to meet increased P demand under N application in a subtropical forest ecosystem.  
547 *Biology and Fertility of Soils*, 54(1): 149-161.

548 Fu, D., Wu, X., Duan, C., Chadwick, D.R. and Jones, D.L., 2020. Response of soil phosphorus fractions and fluxes to  
549 different vegetation restoration types in a subtropical mountain ecosystem. *CATENA*, 193: 104663.

550 Fu, D., Wu, X., Duan, C., Zhao, L. and Li, B., 2020. Different life-form plants exert different rhizosphere effects on  
551 phosphorus biogeochemistry in subtropical mountainous soils with low and high phosphorus content. *Soil and*  
552 *Tillage Research*, 199: 104516.

553 Gallardo, A., Fernández-Palacios, J.M., Bermúdez, A., de Nascimento, L. and Durán, J. et al., 2020. The pedogenic  
554 Walker and Syers model under high atmospheric P deposition rates. *Biogeochemistry*, 148(3): 237-253.

555 García Velázquez, L., Rodríguez, A., Gallardo, A., Maestre, F.T. and Dos Santos, E. et al., 2020. Climate and soil  
556 micro-organisms drive soil phosphorus fractions in coastal dune systems. *Functional Ecology*, 34(8): 1690-1701.

557 Gatiboni, L.C., Vargas, C.O., Albuquerque, J.A., Almeida, J.A. and Stahl, J. et al., 2017. Phosphorus fractions in soil  
558 after successive crops of *Pinus taeda* L. without fertilization. *Ciência Rural*, 47(7): e20160595.

559 Gu, C., Dam, T., Hart, S.C., Turner, B.L. and Chadwick, O.A. et al., 2020. Quantifying Uncertainties in Sequential  
560 Chemical Extraction of Soil Phosphorus Using XANES Spectroscopy. *Environmental Science & Technology*,  
561 54(4): 2257-2267.

562 Haichao, G., Xuehua, L., Wenbin, W., Xiaoping, W. and Jie, Z., 2016. Effect of Different Sources of Phosphorus  
563 Fertilization on Rubber Tree Seedlings Growth and Soil Phosphorus Fractions (published in Chinese with English  
564 abstract). *Chinese Journal of Tropical Crops*, 37(1): 1-6.

565 Hauenstein, S., Neidhardt, H., Lang, F., Krüger, J. and Hofmann, D. et al., 2018. Organic layers favor phosphorus  
566 storage and uptake by young beech trees (*Fagus sylvatica* L.) at nutrient poor ecosystems. *Plant and Soil*, 432(1-2):  
567 289-301.

568 He, X., Chu, C., Yang, Y., Shu, Z. and Li, B. et al., 2021. Bedrock and climate jointly control the phosphorus status of  
569 subtropical forests along two elevational gradients. *CATENA*, 206: 105525.

570 Jia, S., Wu, C., Liu, X. and Guo, J., 2019. Effects of harvest residue treatments on soil phosphorus fractions and  
571 availability in a young Chinese fir plantation (published in Chinese with English abstract). *Chinese Journal of*  
572 *Applied Ecology*, 30(11): 3662-3670.

573 Jien, S., Baillie, I., Hu, C., Chen, T. and Iizuka, Y. et al., 2016. Forms and distribution of phosphorus in a placic  
574 podzolic toposequence in a subtropical subalpine forest, Taiwan. *CATENA*, 140: 145-154.

575 Julich, D., Julich, S. and Feger, K., 2017. Phosphorus fractions in preferential flow pathways and soil matrix in  
576 hillslope soils in the Thuringian Forest (Central Germany). *Journal of Plant Nutrition and Soil Science*, 180(3):  
577 407-417.

578 Kunito, T., Hiruta, N., Miyagishi, Y., Sumi, H. and Moro, H., 2018. Changes in phosphorus fractions caused by  
579 increased microbial activity in forest soil in a short-term incubation study. *Chemical Speciation & Bioavailability*,  
580 30(1): 9-13.

581 Lang, F., Krüger, J., Amelung, W., Willbold, S. and Frossard, E. et al., 2017. Soil phosphorus supply controls P  
582 nutrition strategies of beech forest ecosystems in Central Europe. *Biogeochemistry*, 136(1): 5-29.

583 Lei, W., Hu, Y., Yang, Z., He, J. and Xiao, H. et al., 2019. Effects of reclamation on the soil phosphorus fractions of  
584 alpine meadow in Northwest Sichuan (published in Chinese with English abstract). *Acta Prataculturarum Sinica*,  
585 28(5): 36-45.

586 Li, T., Zheng, W., Zhang, S., Jia, Y. and Li, Y. et al., 2018. Spatial variations in soil phosphorus along a gradient of  
587 central city-suburb-exurban satellite. *CATENA*, 170: 150-158.

588 Li, Y., Han, D., Gao, C., Liu, H. and Cong, J. et al., 2020. A 2000-year record of phosphorus forms and accumulation  
589 in peatland of the Greater Khingan Mountains in Northeast China: Paleoenvironmental implications. *Quaternary*  
590 *International*, 562: 27-34.

591 Lin, C., Tian, G., Pai, C. and Chiu, C., 2018. Characterization of Phosphorus in Subtropical Coastal Sand Dune Forest  
592 Soils. *Forests*, 9(11): 710.

593 Liu, X., Cheng, X., Tian, H., Jia, X. and Han, H., 2018. Characteristics of soil phosphorus fractions under different  
594 thinning intensities in *Larix principis-rupprechtii* plantation and the affecting factors (published in Chinese with  
595 English abstract). *Chinese Journal of Applied Ecology*, 29(12): 3941-3948.

596 Liu, X., Han, H., Cheng, X. and Tian, H., 2019. Phosphorus Fractions in Soil after Successive Crops of *Larix*  
597 *principis-rupprechtii* (published in Chinese with English abstract). *Journal of Northeast Forestry University*, 47(1):  
598 47-51.

599 Liu, Y., Wu, D., Xu, E., Lu, S. and Liu, X. et al., 2020. Effects of Chinese Fir Interplanting with Broadleaved Tree on

Soil Phosphorus Fractions (published in Chinese with English abstract). *Journal of Soil and Water Conservation*, 34(1): 275-282.

Liu, Y., Zhang, G., Luo, X., Hou, E. and Zheng, M. et al., 2021. Mycorrhizal fungi and phosphatase involvement in rhizosphere phosphorus transformations improves plant nutrition during subtropical forest succession. *Soil Biology and Biochemistry*, 153: 108099.

Luo, L., Ye, H., Zhang, D., Gu, J. and Deng, O., 2021. The dynamics of phosphorus fractions and the factors driving phosphorus cycle in Zoige Plateau peatland soil. *Chemosphere*, 278: 130501.

Ma, J., Ma, Y., Wei, R., Chen, Y. and Weng, L. et al., 2021. Phosphorus transport in different soil types and the contribution of control factors to phosphorus retardation. *Chemosphere*, 276: 130012.

Maharjan, M., Maranguit, D. and Kuzyakov, Y., 2018. Phosphorus fractions in subtropical soils depending on land use. *European Journal of Soil Biology*, 87: 17-24.

Masuda, G., Maruyama, H., Lambers, H. and Wasaki, J., 2021. Formation of dauciform roots by Japanese native Cyperaceae and their contribution to phosphorus dynamics in soils. *Plant and Soil*, 461(1-2): 107-118.

Mou, X.M., Wu, Y., Niu, Z., Jia, B. and Guan, Z. et al., 2020. Soil phosphorus accumulation changes with decreasing temperature along a 2300 m altitude gradient. *Agriculture, Ecosystems & Environment*, 301: 107050.

Müller, M., Oelmann, Y., Schickhoff, U., Böhner, J. and Scholten, T., 2017. Himalayan treeline soil and foliar C:N:P stoichiometry indicate nutrient shortage with elevation. *Geoderma*, 291: 21-32.

Negassa, W., Michalik, D., Klysubun, W. and Leinweber, P., 2020. Phosphorus Speciation in Long-Term Drained and Rewetted Peatlands of Northern Germany. *Soil Systems*, 4(1): 11.

Niederberger, J., Kohler, M. and Bauhus, J., 2019. Distribution of phosphorus fractions with different plant availability in German forest soils and their relationship with common soil properties and foliar P contents. *SOIL*, 5(2): 189-204.

Oelmann, Y., Brauckmann, H., Schreiber, K. and Broll, G., 2017. 40 years of succession or mulching of abandoned grassland affect phosphorus fractions in soil. *Agriculture, Ecosystems & Environment*, 237: 66-74.

Pushkareva, E., Baumann, K., Van, A.T., Mikhailyuk, T. and Baum, C. et al., 2021. Diversity of microbial phototrophs and heterotrophs in Icelandic biocrusts and their role in phosphorus-rich Andosols. *Geoderma*, 386: 114905.

Qin, G., Wu, J., Zheng, X., Zhou, R. and Wei, Z., 2019. Phosphorus Forms and Associated Properties along an Urban–Rural Gradient in Southern China. *Water*, 11(12): 2504.

Qu, F., Shao, H., Meng, L., Yu, J. and Xia, J. et al., 2018. Forms and vertical distributions of soil phosphorus in newly formed coastal wetlands in the Yellow River Delta estuary. *Land Degradation & Development*, 29(11): 4219-4226.

Rosling, A., Midgley, M.G., Cheeke, T., Urbina, H. and Fransson, P. et al., 2016. Phosphorus cycling in deciduous forest soil differs between stands dominated by ecto- and arbuscular mycorrhizal trees. *New Phytologist*, 209(3): 1184-1195.

Shiau, Y., Pai, C., Tsai, J., Liu, W. and Yam, R. et al., 2018. Characterization of Phosphorus in a Toposequence of Subtropical Perhumid Forest Soils Facing a Subalpine Lake. *Forests*, 9(6): 294.

Siebers, N. and Kruse, J., 2019. Short-term impacts of forest clear-cut on soil structure and consequences for organic matter composition and nutrient speciation: A case study. *PLOS ONE*, 14(8): e0220476.

Soltangheisi, A., de Moraes, M.T., Cherubin, M.R., Alvarez, D.O. and de Souza, L.F. et al., 2019. Forest conversion to pasture affects soil phosphorus dynamics and nutritional status in Brazilian Amazon. *Soil and Tillage Research*, 194: 104330.

Spain, A.V., Tibbett, M., Ridd, M. and McLaren, T.I., 2018. Phosphorus dynamics in a tropical forest soil restored after strip mining. *Plant and Soil*, 427(1): 105-123.

Sun, F., Song, C., Wang, M., Lai, D.Y.F. and Tariq, A. et al., 2020. Long-term increase in rainfall decreases soil organic phosphorus decomposition in tropical forests. *Soil Biology and Biochemistry*, 151: 108056.

Tian, H., Cheng, X. and Han, H., 2019. Effects of Post-Thinning Precipitation on Soil Acid Phosphomonoesterase Activity in *Larix principis-rupprechtii* Mayr. Plantations. *Forests*, 10(9): 734.

Tian, H., Cheng, X., Han, H., Jing, H. and Liu, X. et al., 2019. Seasonal Variations and Thinning Effects on Soil Phosphorus Fractions in *Larix principis-rupprechtii* Mayr. Plantations. *Forests*, 10(2): 172.

Uygur, V., Durgun, B. and Senol, H., 2017. Chemical Fractions of Phosphorus: The Effect of Soil Orders, Soil Properties, and Land Use. *Communications in Soil Science and Plant Analysis*, 48(11): 1319-1335.

Viana, T.D.O., Gama-Rodrigues, A.C., Gama-Rodrigues, E.F., Aleixo, S. and Moreira, R.V.D.S. et al., 2018. Phosphorus transformations in alfisols and ultisols under different land uses in the atlantic forest region of Brazil. *Geoderma Regional*, 14: e00184.

Wang, C., Fang, F., Yuan, Z., Zhang, R. and Zhang, W. et al., 2020. Spatial variations of soil phosphorus forms and the risks of phosphorus release in the water-level fluctuation zone in a tributary of the Three Gorges Reservoir. *Science of the Total Environment*, 699: 134124.

Wang, C., Xue, L. and Jiao, R., 2021. Soil phosphorus fractions, phosphatase activity, and the abundance of *phoC* and *phoD* genes vary with planting density in subtropical Chinese fir plantations. *Soil and Tillage Research*, 209: 104946.

Wang, J., Ren, C., Cheng, H., Zou, Y. and Bughio, M.A. et al., 2017. Conversion of rainforest into agroforestry and monoculture plantation in China: Consequences for soil phosphorus forms and microbial community. *Science of*

661 The Total Environment, 595: 769-778.  
662 Wang, T., Wan, X., Wang, L., Zou, B. and Wang, S. et al., 2020. Effects of broadleaved tree plantation on soil  
663 phosphorus fractions and availability in different soil layers in a logged *Cunninghamia lanceolata* woodland  
664 (published in Chinese with English abstract). *Chinese Journal of Applied Ecology*, 31(4): 1088-1096.  
665 Wu, Y., Wang, X., Zhou, J., Bing, H. and Sun, H. et al., 2016. The fate of phosphorus in sediments after the full  
666 operation of the Three Gorges Reservoir, China. *Environmental Pollution*, 214: 282-289.  
667 Ye, Y., Zhao, J., Liu, C. and Guan, Q., 2018. Effects of thinning on phosphorus fractions of rhizosphere soil in *Pinus*  
668 *massoniana* plantations (published in Chinese with English abstract). *Chinese Journal of Ecology*, 37(5): 1364-  
669 1370.  
670 Yu, P., Zhang, X., Gu, H., Pan, J. and Chen, X., 2021. Soil phosphorus fractions and their availability over natural  
671 succession from clear-cut of a mixed broadleaved and Korean pine forest in northeast China. *Journal of Forestry*  
672 *Research*.  
673 Zeng, F., Chen, X., Huang, B. and Chi, G., 2018. Distribution Changes of Phosphorus in Soil–Plant Systems of Larch  
674 Plantations across the Chronosequence. *Forests*, 9(9): 563.  
675 Zeng, X., Fan, Y., Lin, K., Yuan, P. and Zhao, P. et al., 2018. Characteristics of soil phosphorus fractions of different  
676 vegetation types in subtropical forests and their driving factors (published in Chinese with English abstract).  
677 *Chinese Journal of Applied Ecology*, 29(7): 2156-2162.  
678 Zeng, X.M., Fan, Y.X., Lin, K.M., Zhao, P.P. and Yuan, P. et al., 2018. Characteristics of soil phosphorus fractions  
679 and microbial communities in *Pinus taiwanensis* Hayata forests at different altitudes in a subtropical region of  
680 China (published in Chinese with English abstract). *Acta Ecologica Sinica*, 38(18): 6570-6579.  
681 Zhang, H., Shi, L. and Fu, S., 2020. Effects of nitrogen deposition and increased precipitation on soil phosphorus  
682 dynamics in a temperate forest. *Geoderma*, 380: 114650.  
683 Zhang, H., Shi, L., Lu, H., Shao, Y. and Liu, S. et al., 2020. Drought promotes soil phosphorus transformation and  
684 reduces phosphorus bioavailability in a temperate forest. *Science of The Total Environment*, 732: 139295.  
685 Zhang, H., Shi, L., Wen, D. and Yu, K., 2016. Soil potential labile but not occluded phosphorus forms increase with  
686 forest succession. *Biology and Fertility of Soils*, 52(1): 41-51.  
687 Zhang, Y., Bhattacharyya, R., Dalal, R.C., Wang, P. and Menzies, N.W. et al., 2020. Impact of land use change and  
688 soil type on total phosphorus and its fractions in soil aggregates. *Land Degradation & Development*, 31(7): 828-  
689 841.  
690  
691  
692
